# Supplementary material for: Neutrophils-to-Lymphocyte Ratio Is Associated with Progression and Overall Survival in Amyotrophic Lateral Sclerosis
Source: MDPI journal article supplement (doi:10.3390/biomedicines10020354), 2022-02-01
Supplement: s1 [file s1]

**Supplemental Figure S1.** Patients' disposition flow diagram in the PRO-ACT database (i.e. selection of the validation cohort)

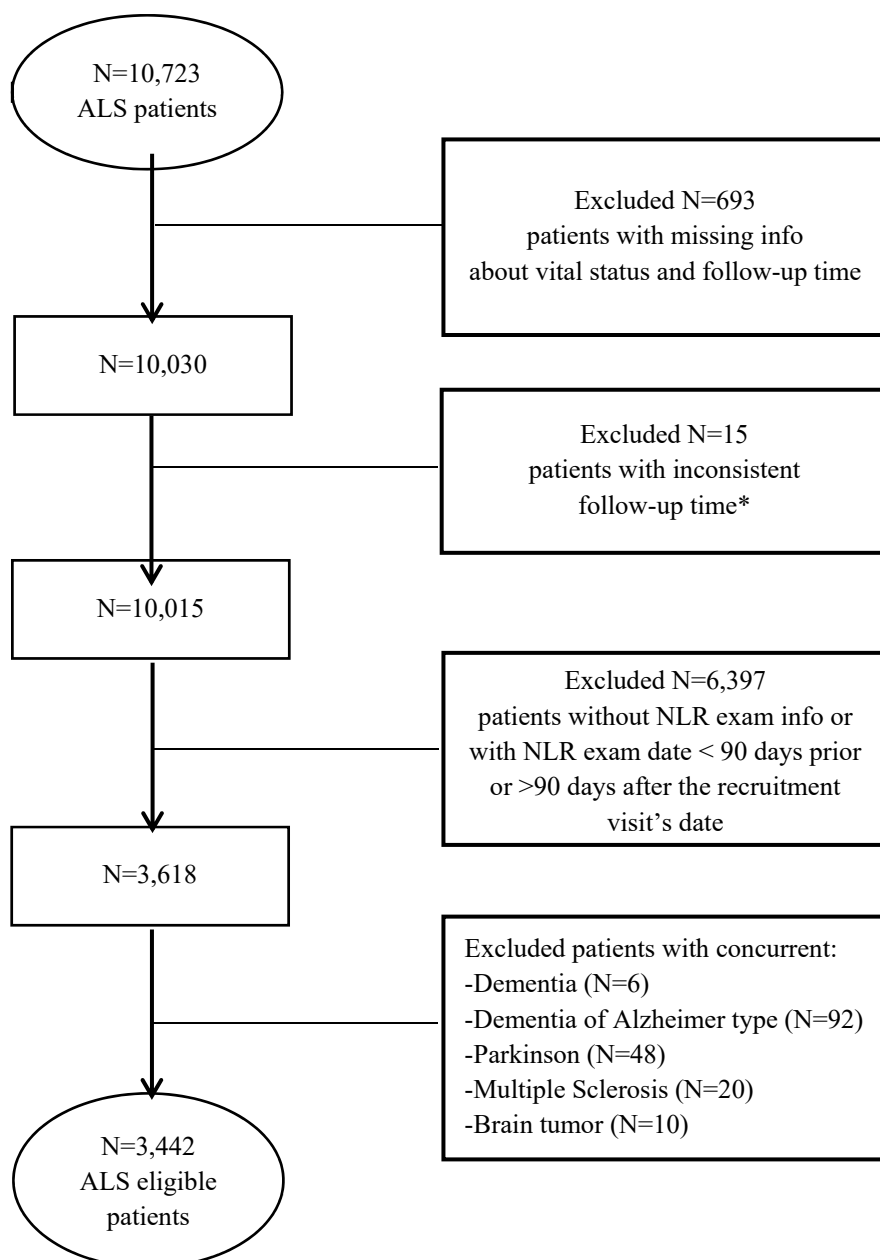

\*There were 15 deceased patients with time to death interval (i.e. from recruitment visit to death dates) lower than the time to the last measurement (i.e. from the recruitment visit to the last date recorded from all databases).

**Supplemental Table S1.** Clinical characteristics of patients collected in the PRO-ACT database, overall and according to the tertiles of Neutrophil-to-Lymphocyte Ratio (NLR) distribution

| Variable                                                     | Category                         | All<br>(N=3,442)       | I: NLR<br>< 1.519<br>(N=347) | II: NLR<br>[1.519-2.326]<br>(N=1,070) | III: NLR<br>> 2.326<br>(N=2,025) | p-value | SMD    | Missing<br>data (%) |
|--------------------------------------------------------------|----------------------------------|------------------------|------------------------------|---------------------------------------|----------------------------------|---------|--------|---------------------|
| Gender - N(%)                                                | Females                          | 1302 (37.8)            | 147 (42.4)                   | 443 (41.4)                            | 712 (35.2)                       | 0.001   | 0.099  | 0%                  |
|                                                              | Males                            | 2140 (62.2)            | 200 (57.6)                   | 627 (58.6)                            | 1313 (64.8)                      |         |        |                     |
| Age at recruitment (years)                                   | Mean±SD                          | 55.50±11.36            | 53.74±11.90                  | 54.68±11.20                           | 56.24±11.28                      | <0.001  | 0.145  | 19.4%               |
| Age at diagnosis (years)                                     | Mean±SD                          | 54.23±11.47            | 52.15±11.74                  | 53.66±11.46                           | 54.86±11.38                      | 0.022   | 0.157  | 63.8%               |
| Age at onset (years)                                         | Mean±SD                          | 53.70±11.39            | 51.89±11.97                  | 52.87±11.26                           | 54.46±11.29                      | <0.001  | 0.149  | 19.6%               |
| Disease duration (months) <sup>§</sup>                       | Median [IQR]                     | 18.02<br>[11.50-28.02] | 18.37<br>[11.93-28.09]       | 18.40<br>[11.47-28.65]                | 17.71<br>[11.43-27.70]           | 0.512*  | 0.042  | 19.6%               |
| Disease duration <sup>§</sup> – N(%)                         | ≤ 12 months                      | 754 (27.2)             | 75 (26.1)                    | 236 (27.5)                            | 443 (27.3)                       | 0.530   | 0.114  | 19.6%               |
|                                                              | 13-24 months                     | 1103 (39.8)            | 117 (40.8)                   | 334 (39.0)                            | 652 (40.1)                       |         |        |                     |
|                                                              | 25-36 months                     | 551 (19.9)             | 47 (16.4)                    | 175 (20.4)                            | 329 (20.3)                       |         |        |                     |
|                                                              | 37-48 months                     | 200 (7.2)              | 29 (10.1)                    | 59 (6.9)                              | 112 (6.9)                        |         |        |                     |
|                                                              | > 48 months                      | 160 (5.8)              | 19 (6.6)                     | 53 (6.2)                              | 88 (5.4)                         |         |        |                     |
| Site of onset - N(%)                                         | Bulbar                           | 713 (20.8)             | 84 (24.2)                    | 233 (21.8)                            | 396 (19.6)                       | 0.204   | 0.080  | 20.0%               |
|                                                              | Limb                             | 2693 (78.4)            | 261 (75.2)                   | 828 (77.5)                            | 1604 (79.4)                      |         |        |                     |
|                                                              | Limb and bulbar                  | 29 (0.8)               | 2 (0.6)                      | 7 (0.7)                               | 20 (1.0)                         |         |        |                     |
| FVC – N(%)                                                   | <80%                             | 461 (44.9)             | 44 (44.9)                    | 129 (40.7)                            | 288 (47.1)                       | 0.174   | 0.087  | 70.2%               |
|                                                              | ≥80%                             | 565 (55.1)             | 54 (55.1)                    | 188 (59.3)                            | 323 (52.9)                       |         |        |                     |
| Use of Riluzole at screening - N(%)                          | No                               | 956 (32.0)             | 114 (38.4)                   | 332 (35.7)                            | 510 (29.0)                       | <0.001  | 0.133  | 13.2%               |
|                                                              | Yes                              | 2031 (68.0)            | 183 (61.6)                   | 598 (64.3)                            | 1250 (71.0)                      |         |        |                     |
| ALSFRS-R                                                     | Mean±SD                          | 37.17±5.57             | 36.83±6.26                   | 37.51±5.51                            | 37.05±5.49                       | 0.346   | 0.080  | 65.4%               |
|                                                              |                                  |                        |                              |                                       |                                  |         |        |                     |
| Time from recruitment to last follow-up (years) <sup>§</sup> | Median [IQR]                     | 1.08 [0.79-1.51]       | 1.08 [0.84-1.51]             | 1.15 [0.83-1.52]                      | 1.07 [0.76-1.51]                 | 0.019*  | 0.086* | 0%                  |
| Mortality rate <sup>§</sup>                                  | events/PYs<br>(rate per 100 PYs) | 1020/3889 (26.2)       | 89/395 (22.6)                | 292/1258 (23.2)                       | 639/2236 (28.6)                  | 0.004°  | ---    |                     |

<sup>§</sup>disease duration is defined as the time interval occurred from ALS onset to trial's recruitment

p-values from ANOVA models or Chi-Square statistics for continuous and categorical variables, respectively. \* p-values from Fisher exact test; ° p-value from Poisson regression; \*analysis on log-transformed values. NLR: Neutrophil-to-Lymphocyte Ratio; SD: standard deviation; IQR: interquartile range (i.e. first-third quartiles); SMD: standardized mean difference (i.e. the average of all possible standardized mean differences); PYs: Person-Years

**Supplemental Figure S2.** Kaplan-Meier (KM) survival curves according to NLR tertiles (panel **A**) and tree-based cut-off (panel **B**) of patients collected in the PRO-ACT database. Censored observations are evidenced on the KM curves as tick marks (“+”)

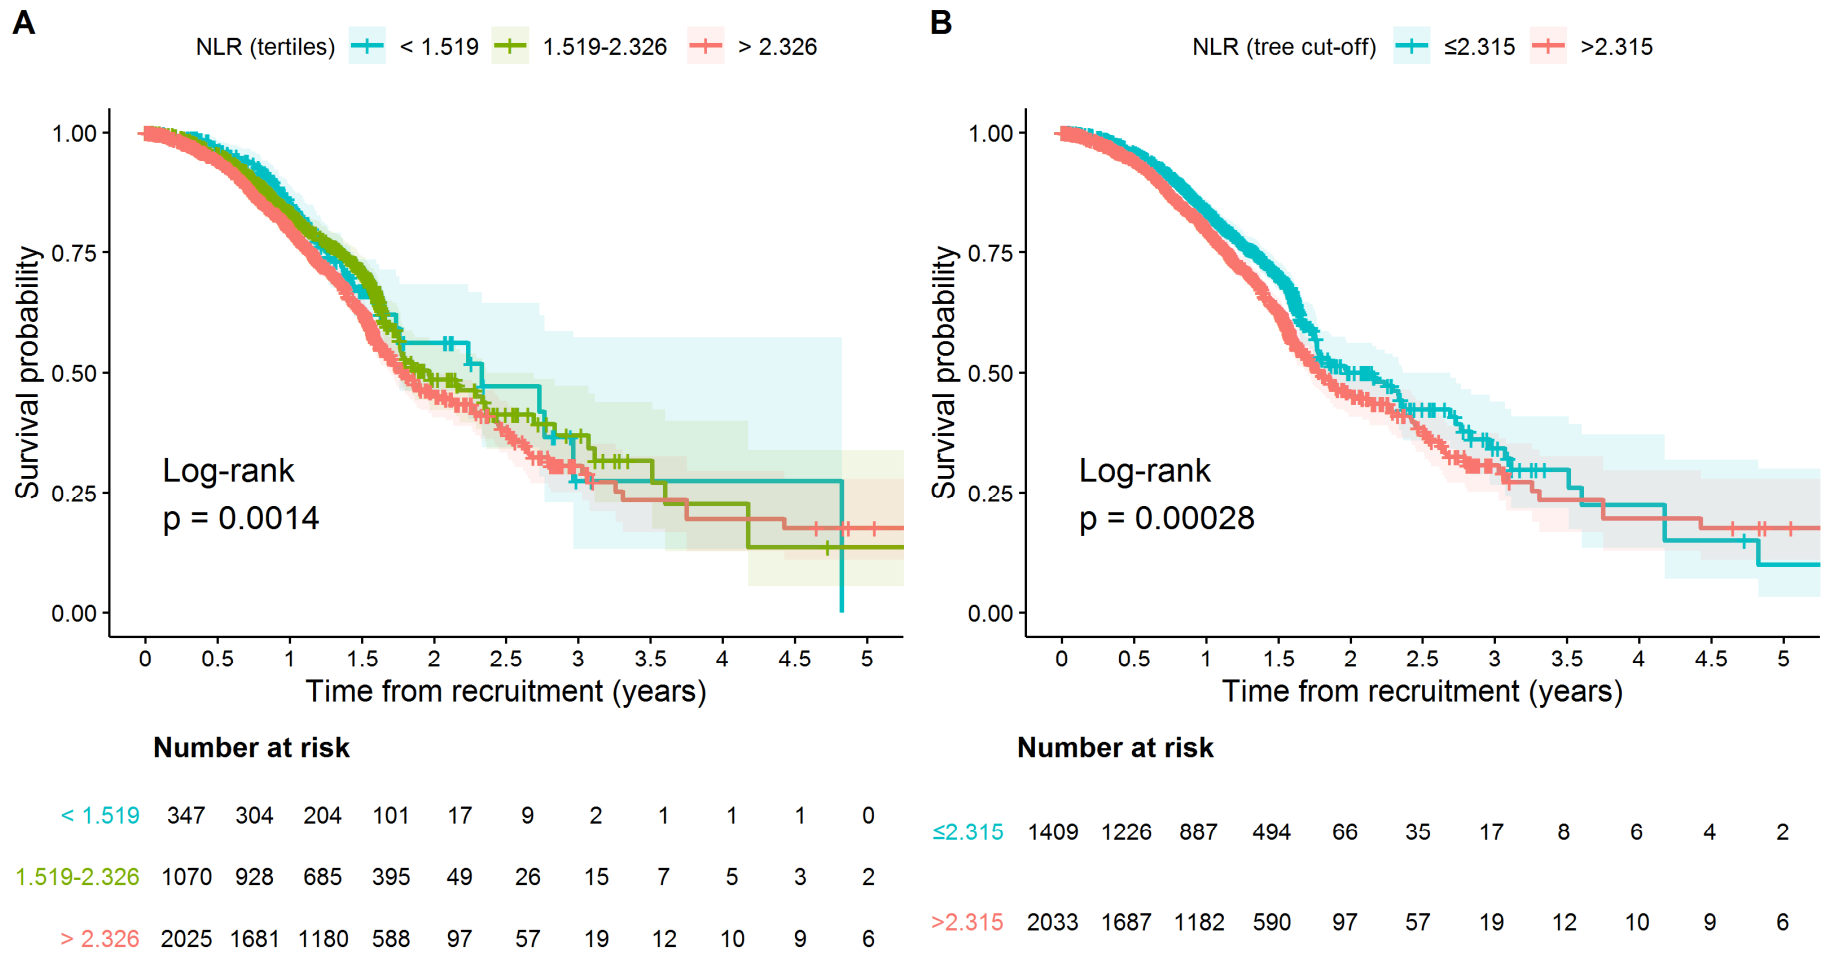

**Supplemental Table S2.** Association between Neutrophil-to-Lymphocyte Ratio (NLR) values and mortality rate. Results from Cox univariable and multivariable models.

| Model type | Variables included into the model (covariates) | Covariates type | Groups (NLR cutoffs) comparison | HR (95%CI) | p-value | Test for functional form | Test for PH (p-value) <sup>#</sup> |
|------------|------------------------------------------------|-----------------|---------------------------------|------------|---------|--------------------------|------------------------------------|
|------------|------------------------------------------------|-----------------|---------------------------------|------------|---------|--------------------------|------------------------------------|

|                             |                            |             | (p-value) <sup>#</sup>    |                  |        |       |       |
|-----------------------------|----------------------------|-------------|---------------------------|------------------|--------|-------|-------|
| Univariable<br>(unadjusted) | NLR                        | Continuous  | --                        | 1.34 (1.16-1.54) | <0.001 | 0.068 | 0.848 |
|                             | NLR (tertiles)             | Categorical | [1.519-2.326] vs. < 1.519 | 0.99 (0.78-1.25) | 0.905  | --    | 0.555 |
|                             |                            |             | > 2.326 vs. < 1.519       | 1.25 (1.00-1.56) | 0.049  | --    | 0.465 |
|                             | NLR (tree-based cut-off)   | Categorical | ≤2.315 vs. >2.315         | 1.27 (1.11-1.44) | <0.001 | --    | 0.450 |
| Multivariable<br>(adjusted) | NLR                        | Continuous  | --                        | 1.15 (0.98-1.36) | 0.089  | 0.137 | 0.818 |
|                             | Age at recruitment (years) | Continuous  | --                        | 1.05 (1.04-1.06) | <0.001 | 0.023 | 0.614 |
|                             | NLR (tertiles)             | Categorical | [1.519-2.326] vs. < 1.519 | 0.95 (0.73-1.25) | 0.717  | --    | 0.771 |
|                             |                            |             | > 2.326 vs. < 1.519       | 1.12 (0.87-1.44) | 0.381  | --    | 0.856 |
|                             | Age at recruitment (years) | Continuous  | --                        | 1.05 (1.04-1.05) | <0.001 | 0.020 | 0.605 |
|                             | NLR (tree-based cut-off)   | Categorical | ≤2.315 vs. >2.315         | 1.17 (1.01-1.35) | 0.042  | --    | 0.804 |
|                             | Age at recruitment (years) | Continuous  | --                        | 1.05 (1.04-1.05) | <0.001 | 0.022 | 0.606 |

HR: Hazard Ratio; CI: Confidence Interval; PH: Proportional Hazards

<sup>#</sup>To check the adequacy of the fitted Cox regression models (i.e. checking of the functional form of a continuous covariate included into the Cox model and the assessment of the PH assumption), the Kolmogorov-type supremum test for functional form and for PH assumption was performed on the basis of 1,000 data replicates (simulations). As no polynomial (and interaction) terms of each continuous covariate were included into each Cox model, the test for functional form assessed whether a linear relationship existed between a one unit increase of the continuous covariate and the risk of death.
